# Supplementary material for: On the growth morphology and crystallography of the epitaxial Cu7Te4/CdTe interface
Source: Royal Society of Chemistry journal article supplement (doi:10.1039/c7ce02091k), 2018-01-01
Supplement: c7ce02091k1.pdf [file c7ce02091k1.pdf]

# On the Growth Morphology and Crystallography of Epitaxial CdTe/Cu<sub>7</sub>Te<sub>4</sub> Interface

Fang Wang<sup>a</sup>, Yimin Lei<sup>b</sup>, Dapeng Wang<sup>a</sup>, Zhibin Lei<sup>a</sup>, Jie Sun<sup>a,\*</sup> and Zonghuai Liu<sup>a,\*</sup>

*a.* Key Laboratory of Applied Surface and Colloid Chemistry (MOE), Shaanxi Engineering Lab for Advanced Energy Technology, School of Materials Science and Engineering, Shaanxi Normal University, 620 West Chang'an Street, Xi'an, Shaanxi 710119, China.

*b.* School of Advanced Materials and Nanotechnology, Xidian University, 266# Xifeng Road, Xi'an, Shaanxi, 710126, China.

## Supplementary Materials

### The detailed NCSL calculation process on the CdTe/Cu<sub>7</sub>Te<sub>4</sub> interface

According to the definition of NCSL, the basal vectors of CdTe substrate  $\mathbf{R}_{S1}$ ,  $\mathbf{R}_{S2}$  and  $\mathbf{R}_{F1}$ ,

$\mathbf{R}_{F2}$  can be written as:

$$\mathbf{R}_{S1} = a_1 \begin{bmatrix} 1 \\ 0 \end{bmatrix}, \quad \mathbf{R}_{S2} = \frac{\sqrt{2}}{2} a_1 \begin{bmatrix} 0 \\ 1 \end{bmatrix} \quad (\text{S1})$$

$$\mathbf{R}_{F1} = c \begin{bmatrix} 1 \\ 0 \end{bmatrix}, \quad \mathbf{R}_{F2} = \frac{\sqrt{3}}{2} a_2 \begin{bmatrix} 0 \\ 1 \end{bmatrix} \quad (\text{S2})$$

Here,  $a_1$  and  $a_2$ ,  $c$  represents the lattice parameter of CdTe and Cu<sub>7</sub>Te<sub>4</sub> respectively.

After the rotation process, the vectors  $\mathbf{R}_{RF1}$  and  $\mathbf{R}_{RF2}$  can also be obtained:

$$(R_{RF1}, R_{RF2}) = (Z/\theta)(R_{F1}, R_{F2}) \quad (S3)$$

Here,  $(Z/\theta)$  represents the rotation matrix which can be expressed as:

$$(Z/\theta) = \begin{bmatrix} \cos\theta & -\sin\theta \\ \sin\theta & \cos\theta \end{bmatrix} \quad (S4)$$

In this case, the Eq. (S3) can be written as:

$$(R_{RF1}, R_{RF2}) = \begin{bmatrix} \cos\theta & -\sin\theta \\ \sin\theta & \cos\theta \end{bmatrix} \begin{bmatrix} c & 0 \\ 0 & \frac{\sqrt{3}}{2}a_2 \end{bmatrix} = \begin{bmatrix} c\cos\theta & -\frac{\sqrt{3}}{2}a_2\sin\theta \\ c\sin\theta & \frac{\sqrt{3}}{2}a_2\cos\theta \end{bmatrix} \quad (S5)$$

Therefore,

$$R_{RF1} = c \begin{bmatrix} \cos\theta \\ \sin\theta \end{bmatrix}, R_{RF2} = \frac{\sqrt{3}}{2}a_2 \begin{bmatrix} -\sin\theta \\ \cos\theta \end{bmatrix} \quad (S6)$$

In this case, the NCSL basal vectors  $V_1$  and  $V_2$  can be expressed as:

$$V_1 = mR_{S1} + nR_{S2} = a_1 \begin{bmatrix} m \\ 0 \end{bmatrix} + \frac{\sqrt{2}}{2}a_1 \begin{bmatrix} 0 \\ n \end{bmatrix} = a_1 \begin{bmatrix} m \\ \frac{\sqrt{2}}{2}n \end{bmatrix} \quad (S7)$$

$$V_2 = pR_{RF1} + qR_{RF2} = pc \begin{bmatrix} \cos\theta \\ \sin\theta \end{bmatrix} + \frac{\sqrt{3}}{2}qa_2 \begin{bmatrix} -\sin\theta \\ \cos\theta \end{bmatrix} = \begin{bmatrix} pcc\cos\theta - \frac{\sqrt{3}}{2}qa_2\sin\theta \\ pc\sin\theta + \frac{\sqrt{3}}{2}qa_2\cos\theta \end{bmatrix} \quad (S8)$$

Here,  $m$ ,  $n$ ,  $p$  and  $q$  are all integers. According to the definition of NCSL,  $V_1$  and  $V_2$  should be equal, the 2 vectors must have the same vector module and parallel to each other.

Therefore, combine the Eq. (S7) and (S8), the following equation can be obtained:

$$\begin{cases} ma_1 = pcc\cos\theta - \frac{\sqrt{3}}{2}qa_2\sin\theta \\ \frac{\sqrt{2}}{2}na_1 = pc\sin\theta + \frac{\sqrt{3}}{2}qa_2\cos\theta \end{cases} \quad (S9)$$

From Eq. (S9), the expressions of  $\tan\theta$ ,  $\Sigma$  and the relationship between the 4 integers can be obtained accordingly:

$$\begin{cases} m^2 a_1^2 + \frac{1}{2} n^2 a_2^2 = p^2 c^2 + \frac{3}{4} q^2 a_2^2 \\ \tan\theta = \frac{2\sqrt{2}npc - 2\sqrt{3}mqa_2}{4mpc + \sqrt{6}nqa_2} \\ \Sigma = \frac{V_{Super}}{V_{Unit}} = \frac{4p^2 c^2 + 3q^2 a_2^2}{2\sqrt{3}a_2 c} \end{cases} \quad (S10)$$

According to the TEM results in Fig. 2, the parallel relationship of  $(1\bar{1}1)_{CuTe} // (0001)_{Cu_7Te_4}$  can be obtained. In addition, it is also noticed that the interplanar distance of  $(0001)_{Cu_7Te_4}$  (0.7211 nm) is very close to that of  $(01\bar{1}0)_{Cu_7Te_4}$  (0.7218 nm). This means that the established  $Cu_7Te_4$  unit cell is similar to square. To simplify the calculation, the following relations can be set:

$$\begin{cases} \frac{\sqrt{3}}{3} a_1 = \frac{1}{2} c \\ c = \frac{\sqrt{3}}{2} a_2 \end{cases} \quad (S11)$$

In this case, Eq. (S10) can be simplified to be:

$$\begin{cases} \frac{3}{4} m^2 + \frac{3}{8} n^2 = p^2 + q^2 \\ \tan\theta = \frac{\sqrt{2}np - 2mq}{2mp + \sqrt{2}nq} \\ \Sigma = \frac{V_{Super}}{V_{Unit}} = p^2 + q^2 \end{cases} \quad (S12)$$

Under the principle that the value of the 4 integers should be as small as possible, the calculation results are summarized in Table S1. The rotation angle of  $\pm 54.74^\circ$  and  $\pm 35.26^\circ$  refer to the variant 1 and 2 of  $Cu_7Te_4$  respectively. The same  $\Sigma$  values suggest the equivalent status of the COR obtained by applying the rotation along the 4 rotation angles.

Table S1 The calculation results of the CdTe/Cu<sub>7</sub>Te<sub>4</sub> interface

| $m$ | $n$ | $p$ | $q$ | $\tan\theta$          | $\theta$ | $\Sigma$ |
|-----|-----|-----|-----|-----------------------|----------|----------|
| 2   | 4   | 3   | 0   | $\sqrt{2}$            | 54.74°   | 9        |
| -2  | 4   | 3   | 0   | $-\sqrt{2}$           | -54.74°  | 9        |
| 2   | 4   | 0   | 3   | $-\frac{\sqrt{2}}{2}$ | -35.26°  | 9        |
| -2  | 4   | 0   | 3   | $\frac{\sqrt{2}}{2}$  | 35.26°   | 9        |
